# Supplementary material
Source: PubMed Central journal article supplement (PMC5118476)

# Supplemental Figure 1

Lichtnekert / Kaverina et al

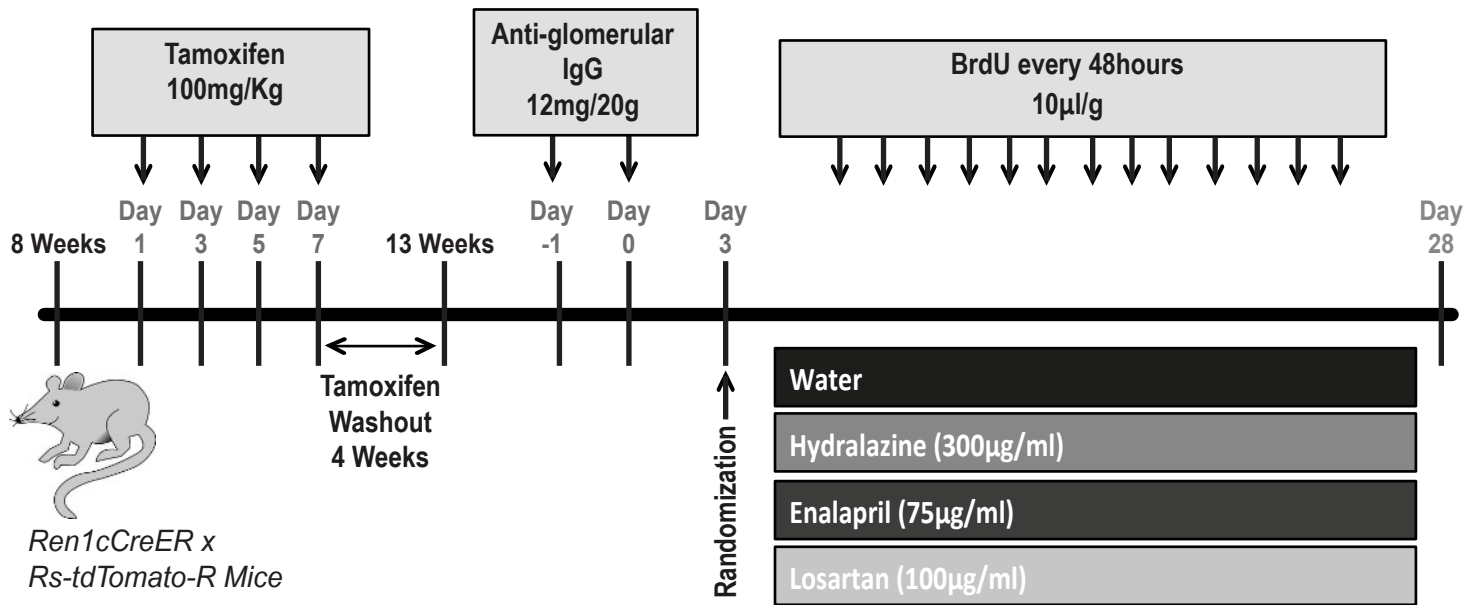

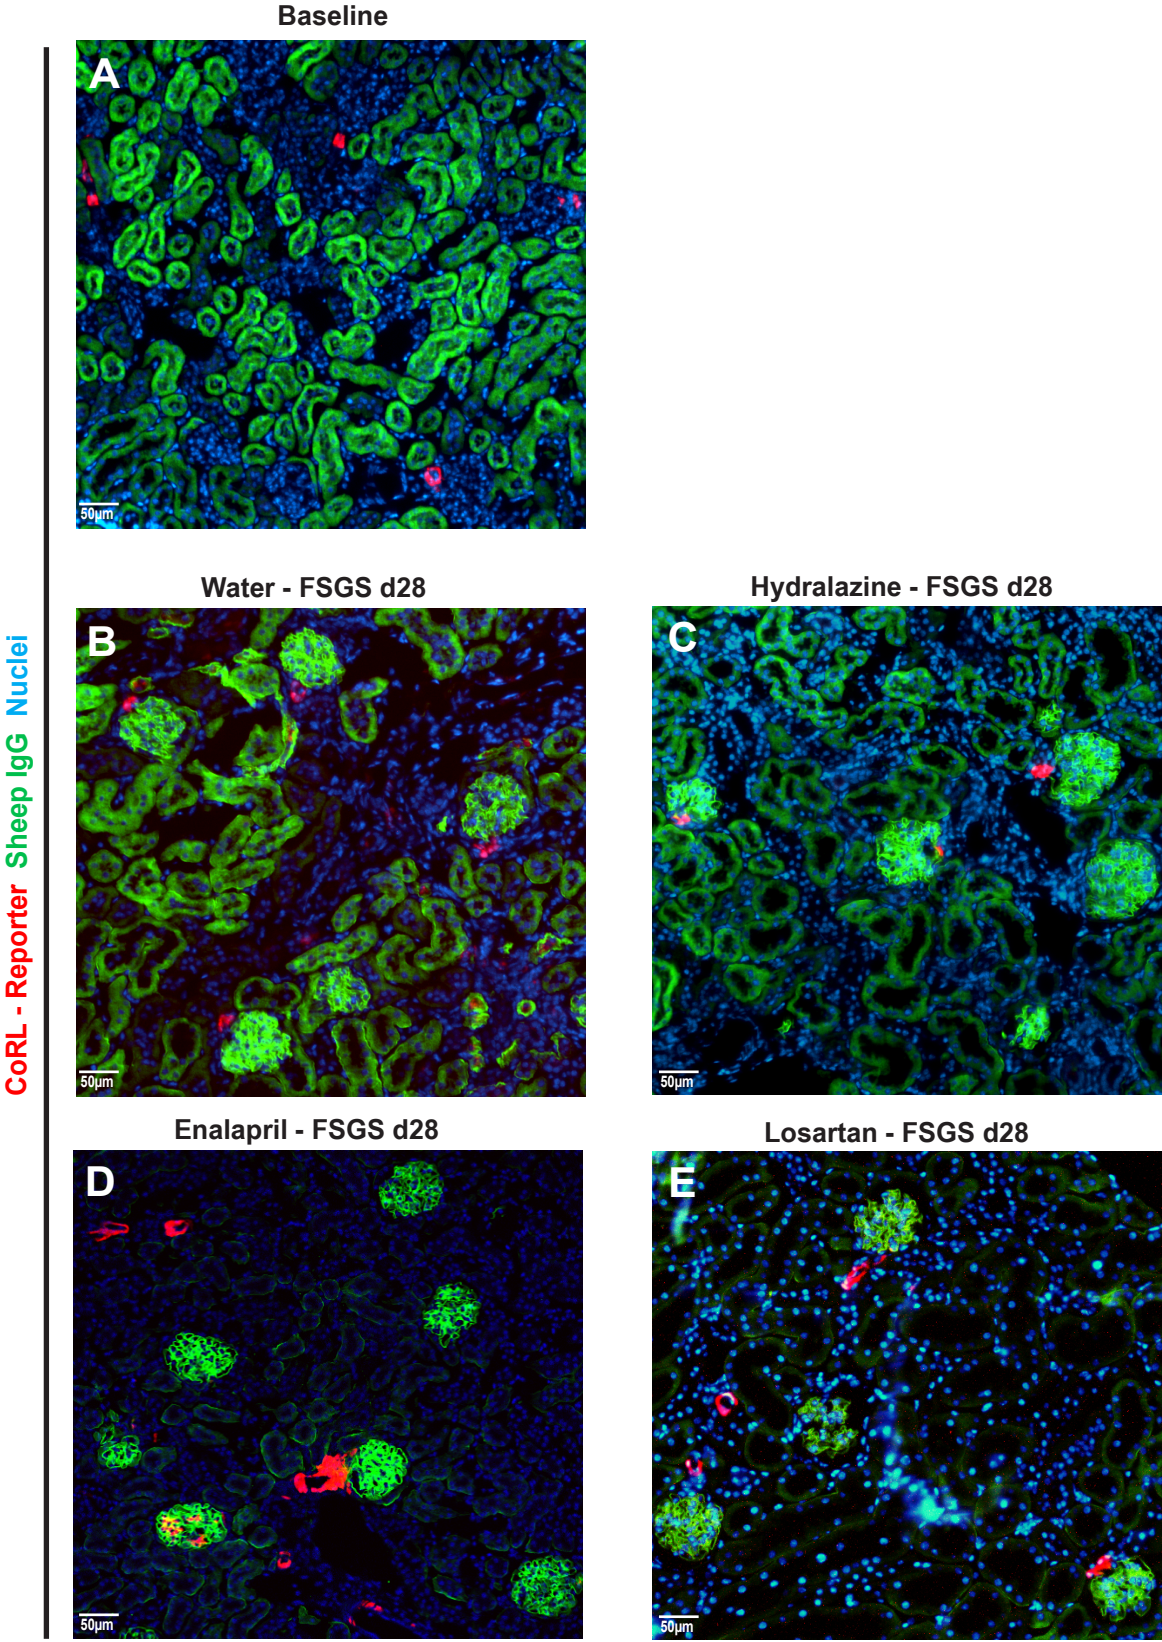

**A**

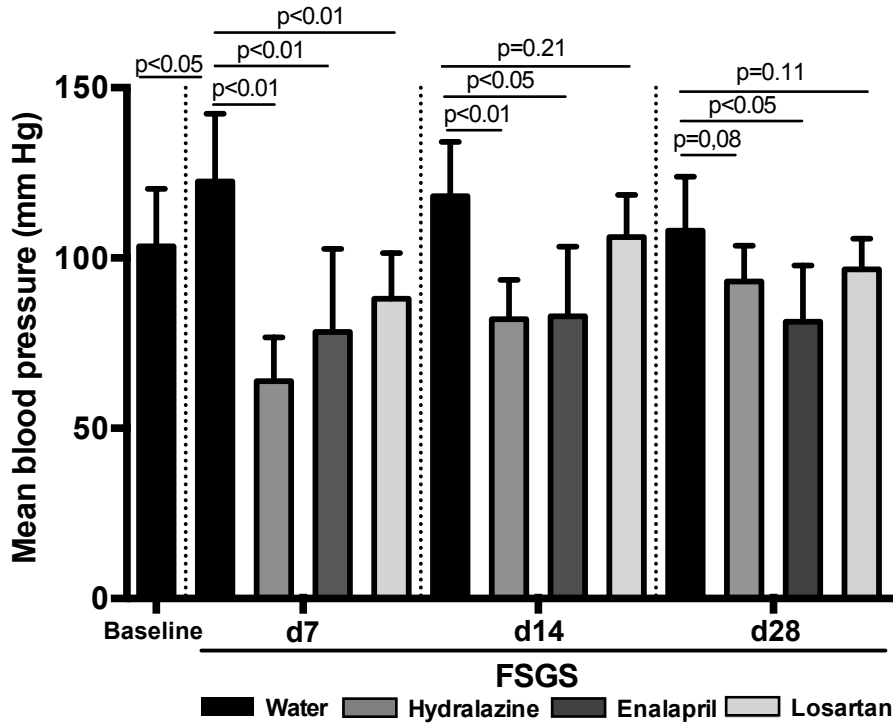

**B**

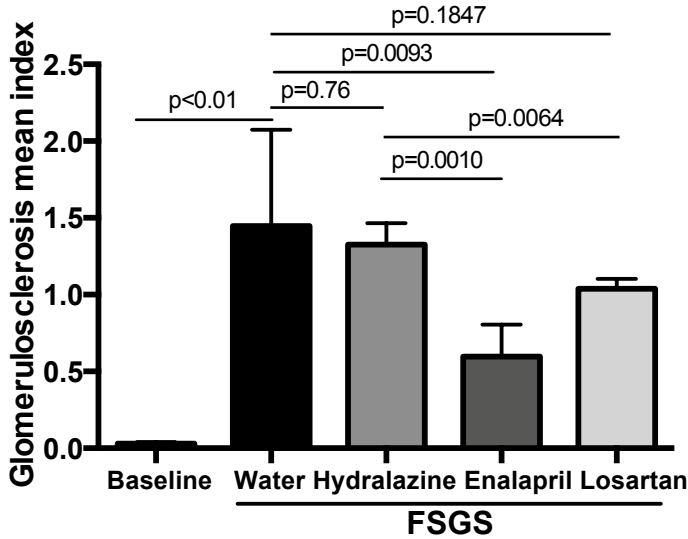

**C**

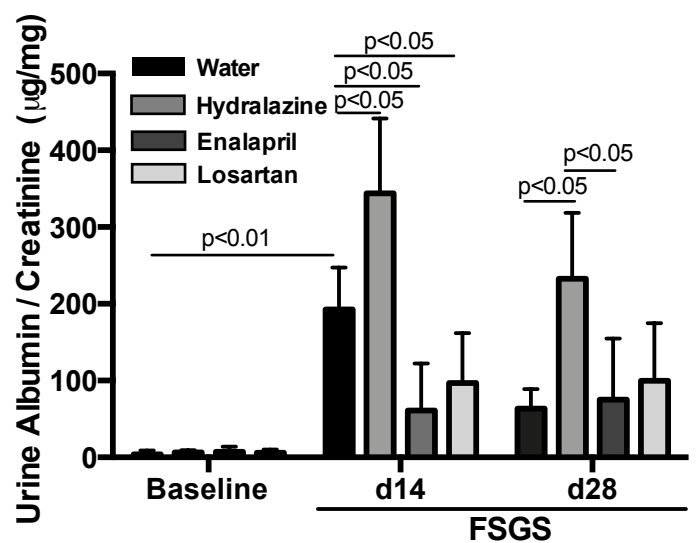

# Supplemental Figure 4

Lichtnekert / Kaverina et al

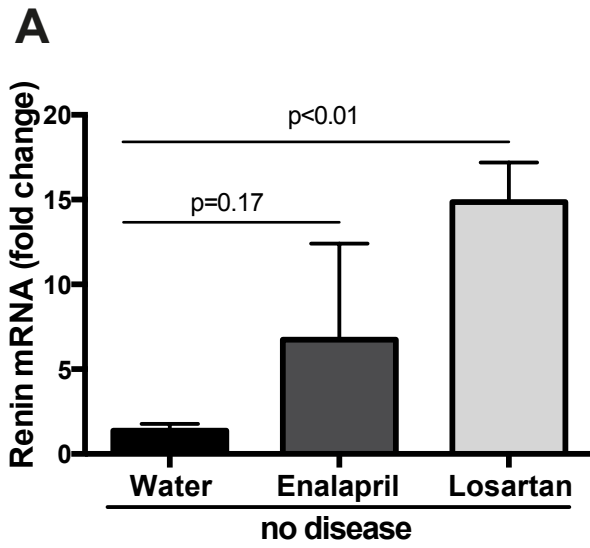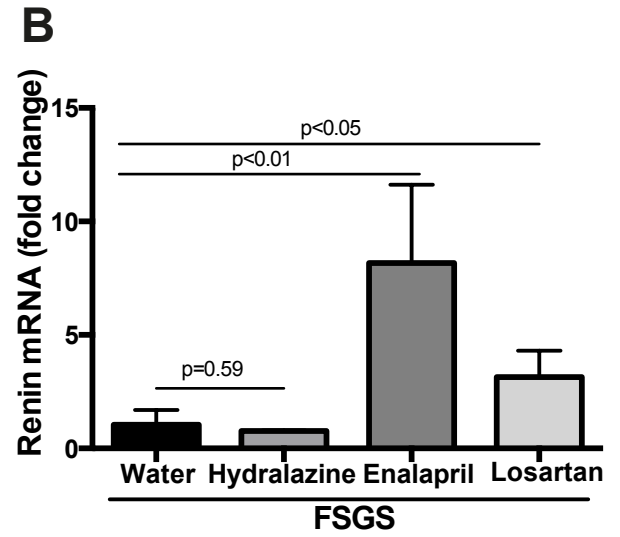

Supplement: ASN.2015080877SupplementaryData1.pdf [file ASN.2015080877SupplementaryData1.pdf]
